# Supplementary material
Source: Springer Nature journal article supplement (https://www.springermedizin.de/resource/supplementary/13012_2012_626_MOESM3_ESM.pdf/9630388)

**Wicked context**

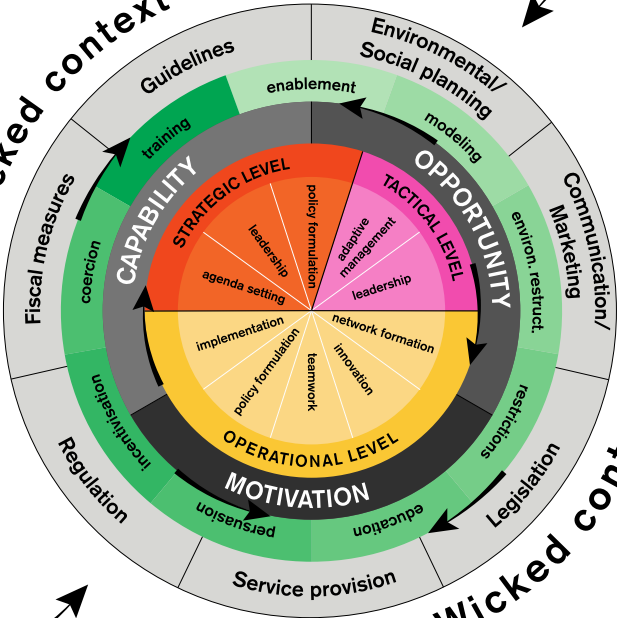

**Wicked context**

Supplement: MOESM3 [file 9630388]
